# Supplementary material
Source: Elsevier journal article supplement (https://www.sciencedirect.com/science/article/pii/S1134793719300120)

**Appendix**

**Spanish version of the ORS and the SRS.**

Copyright 2000, 2002, respectively by B. L. Duncan and S. D. Miller. For examination only. Free working copies for individual use in 28 languages are available at <https://www.betteroutcomesnow.com/>


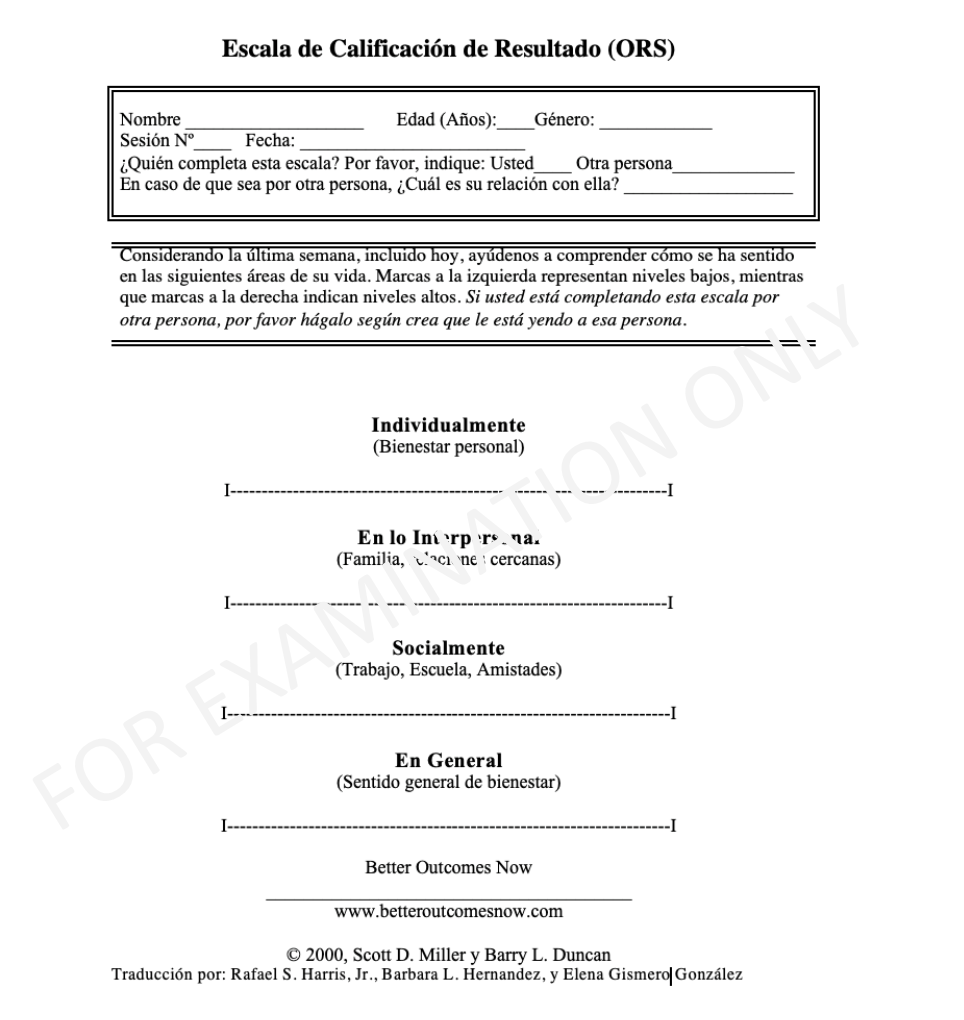

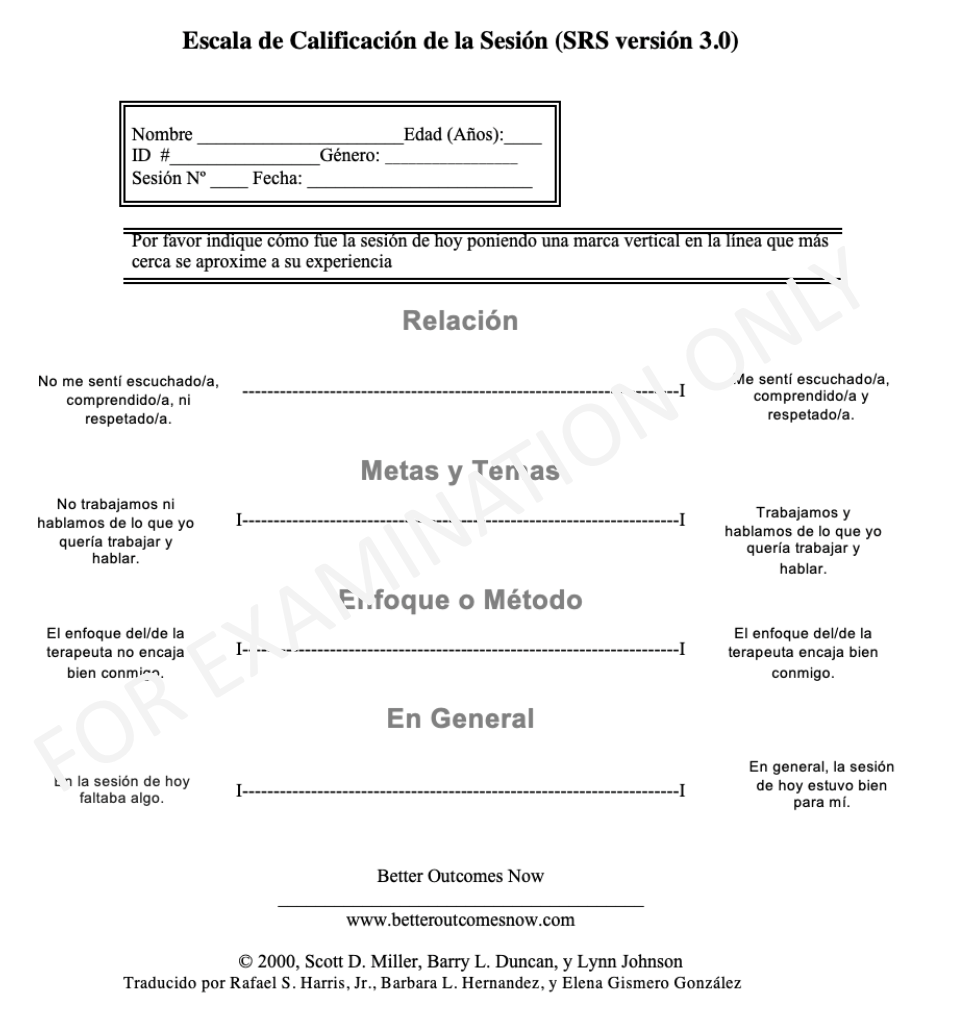

Supplement: mmc1 [file S1134793719300120:mmc1.docx]
